# Supplementary material for: Application of 2D-liquid chromatography for the separation of a mixture of isomeric and structurally related azatryptophan derivatives
Source: Royal Society of Chemistry journal article supplement (doi:10.1039/d5ay00473j), 2025-01-01
Supplement: d5ay00473j1.pdf [file d5ay00473j1.pdf]

# Application of 2D-Liquid Chromatography for the Separation of a Mixture of Isomeric and Structurally Related Azatryptophan Derivatives

Parinita Shaw<sup>1</sup>, Pandidurai Sekar<sup>1</sup>, Balasaheb Chavan<sup>1\*</sup>, Sharad Duche<sup>1\*</sup>, Arvind Mathur<sup>2</sup>, Amrita Roy<sup>1</sup>

<sup>1</sup>Discovery Analytical Sciences, Biocon Bristol Myers Squibb Research & Development Center (BBRC), Bangalore, India.

<sup>2</sup>Discovery & Development Sciences, Bristol Myers Squibb, P.O. Box 5400, Princeton, New Jersey 08543-4000, United States.

## CRediT author statement

Parinita Shaw: data collection, visualization, investigation, and writing experiments; Pandidurai Sekar: data collection; Balasaheb Chavan: data investigation, validation, and manuscript drafting; Sharad Duche: conceptualization, methodology, validation, supervision, reviewing, and editing; Amrita Roy: supervision, draft reviewing, and editing; Arvind Mathur: supervision, reviewing, and funding acquisition.

\*Corresponding authors:

**Sharad Duche**- Discovery Analytical Sciences, Biocon Bristol-Myers Squibb R&D Center, Syngene International Ltd, Biocon Park, Plot No. 2 & 3, Bommasandra IV Phase, Jigani Link Road, Bangalore 560099, India.

Email: [sharad.duche@syngeneintl.com](mailto:sharad.duche@syngeneintl.com)

**Balasaheb Chavan**- Discovery Analytical Sciences, Biocon Bristol-Myers Squibb R&D Center, Syngene International Ltd, Biocon Park, Plot No. 2 & 3, Bommasandra IV Phase, Jigani Link Road, Bangalore 560099, India.

Email: [balasaheb.chavan@syngeneintl.com](mailto:balasaheb.chavan@syngeneintl.com)

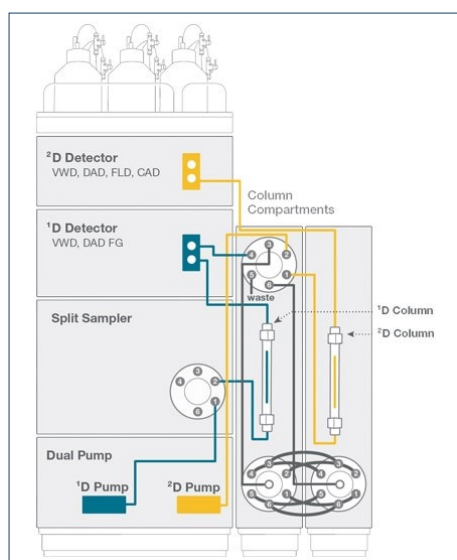

**Figure S1.** Schematic diagram of the Thermo Scientific Vanquish Online 2D-LC system.

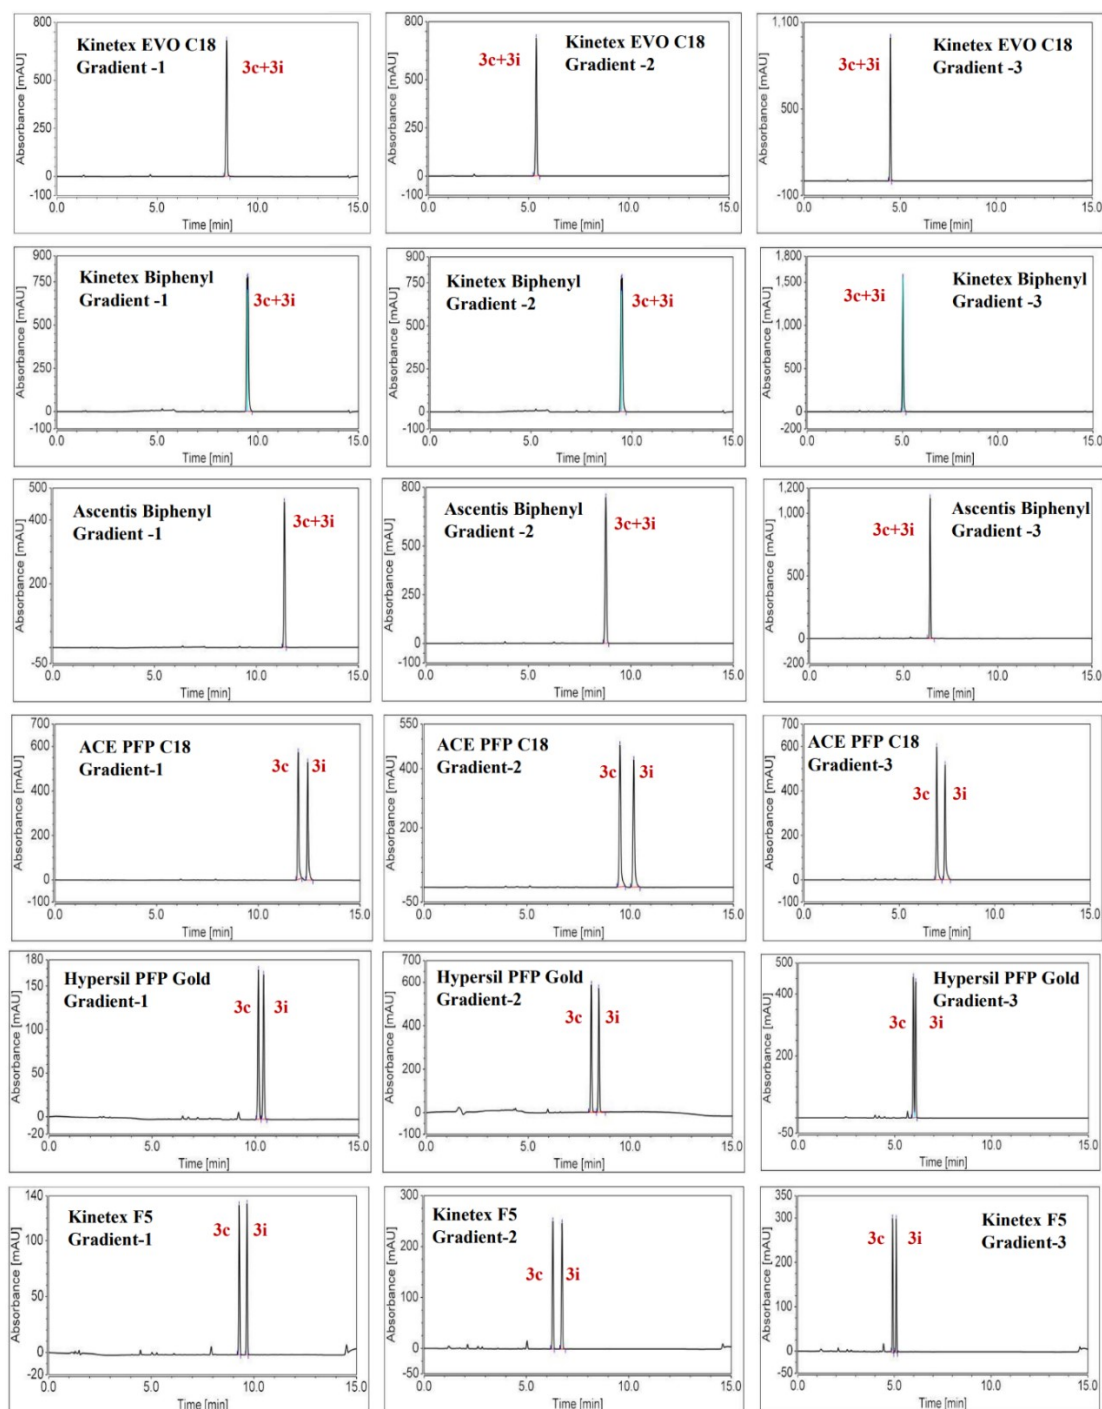

**Figure S2:** Chromatograms of separation of racemate 3c and 3i with mobile phase A as 0.05% TFA in water: ACN (95:5, v/v) and mobile phase B as water: ACN (5:95, v/v) with different stationary phases.

The chromatogram in above figure shows that, racemate 3c and 3i were coeluted with C18 and Ascentis biphenyl stationary phases, whereas split peak was observed with the Kinetex biphenyl column. The separation was observed only with the PFP stationary phases. The racemates were well separated using ACE PFP C18 column whereas slightly broad peak shapes were obtained with the Hypersil PFP Gold column. Best separation and peak shapes were observed with the Kinetex F5 column. (peak asymmetry is 0.98 and 0.99 for 3c and 3i, respectively).

**Table S1:** Chromatograms of separation of racemate 3c and 3i with mobile phase A as 0.05% TFA in water: ACN (95:5, v/v) and mobile phase B as water: ACN (5:95, v/v) with different stationary phases.

| Column used in first dimension                | Gradient     | Peak Name | Retention time (min) | Peak asymmetry | Resolution | Remarks                                                                                 |
|-----------------------------------------------|--------------|-----------|----------------------|----------------|------------|-----------------------------------------------------------------------------------------|
| Kinetex EVO C18 (100x4.6mm), 2.6µm            | Gradient - 1 | 3c        | 8.46                 | 0.92           | No         | No separation                                                                           |
|                                               |              | 3i        |                      |                |            |                                                                                         |
|                                               | Gradient – 2 | 3c        | 5.38                 | 0.92           | No         |                                                                                         |
|                                               |              | 3i        |                      |                |            |                                                                                         |
|                                               | Gradient - 3 | 3c        | 4.50                 | 0.93           | No         |                                                                                         |
|                                               |              | 3i        |                      |                |            |                                                                                         |
| Kinetex BPH (100x4.6mm), 2.6µm                | Gradient - 1 | 3c        | 9.47                 | NA             | No         | Split peak                                                                              |
|                                               |              | 3i        | 9.51                 |                |            |                                                                                         |
|                                               | Gradient – 2 | 3c        | 6.49                 | NA             | No         |                                                                                         |
|                                               |              | 3i        | 6.55                 |                |            |                                                                                         |
|                                               | Gradient - 3 | 3c        | 5.03                 | NA             | No         |                                                                                         |
|                                               |              | 3i        | 5.04                 |                |            |                                                                                         |
| Ascentis® Express Biphenyl (100x2.1mm), 2.7µm | Gradient - 1 | 3c        | 11.37                | 1.07           | No         | No separation                                                                           |
|                                               |              | 3i        |                      |                |            |                                                                                         |
|                                               | Gradient – 2 | 3c        | 8.78                 | 1.00           | No         |                                                                                         |
|                                               |              | 3i        |                      |                |            |                                                                                         |
|                                               | Gradient - 3 | 3c        | 6.41                 | 1.00           | No         |                                                                                         |
|                                               |              | 3i        |                      |                |            |                                                                                         |
| ACE PFP C18 (150x4.6mm), 3µm                  | Gradient - 1 | 3c        | 11.87                | 0.78           | 2.5        | Peaks were well separated                                                               |
|                                               |              | 3i        | 12.32                | 0.84           |            |                                                                                         |
|                                               | Gradient – 2 | 3c        | 7.14                 | 0.93           | 2.2        |                                                                                         |
|                                               |              | 3i        | 7.41                 | 0.95           |            |                                                                                         |
|                                               | Gradient - 3 | 3c        | 6.88                 | 0.85           | 2.5        |                                                                                         |
|                                               |              | 3i        | 5.10                 | 1.07           |            |                                                                                         |
| Thermo Hypersil gold PFP (150x4.6mm), 1.9µm)  | Gradient - 1 | 3c        | 18.59                | 0.96           | 3.3        | Peaks were well separated but peak shape is broad                                       |
|                                               |              | 3i        | 19.05                | 0.95           |            |                                                                                         |
|                                               | Gradient - 2 | 3c        | 14.38                | 1.01           | 3.5        |                                                                                         |
|                                               |              | 3i        | 15.03                | 1.04           |            |                                                                                         |
|                                               | Gradient - 3 | 3c        | 9.58                 | 0.97           | 2.9        |                                                                                         |
|                                               |              | 3i        | 10.05                | 0.96           |            |                                                                                         |
| Kinetex F5 (150x4.6mm), 2.6µm                 | Gradient - 1 | 3c        | 9.28                 | 1.04           | 4.4        | Peaks were well separated and best resolution and peak shape within all column’s trials |
|                                               |              | 3i        | 9.67                 | 1.01           |            |                                                                                         |
|                                               | Gradient – 2 | 3c        | 6.29                 | 0.98           | 4.8        |                                                                                         |
|                                               |              | 3i        | 6.74                 | 0.99           |            |                                                                                         |
|                                               | Gradient - 3 | 3c        | 4.91                 | 1.08           | 2.6        |                                                                                         |
|                                               |              | 3i        | 5.10                 | 1.07           |            |                                                                                         |

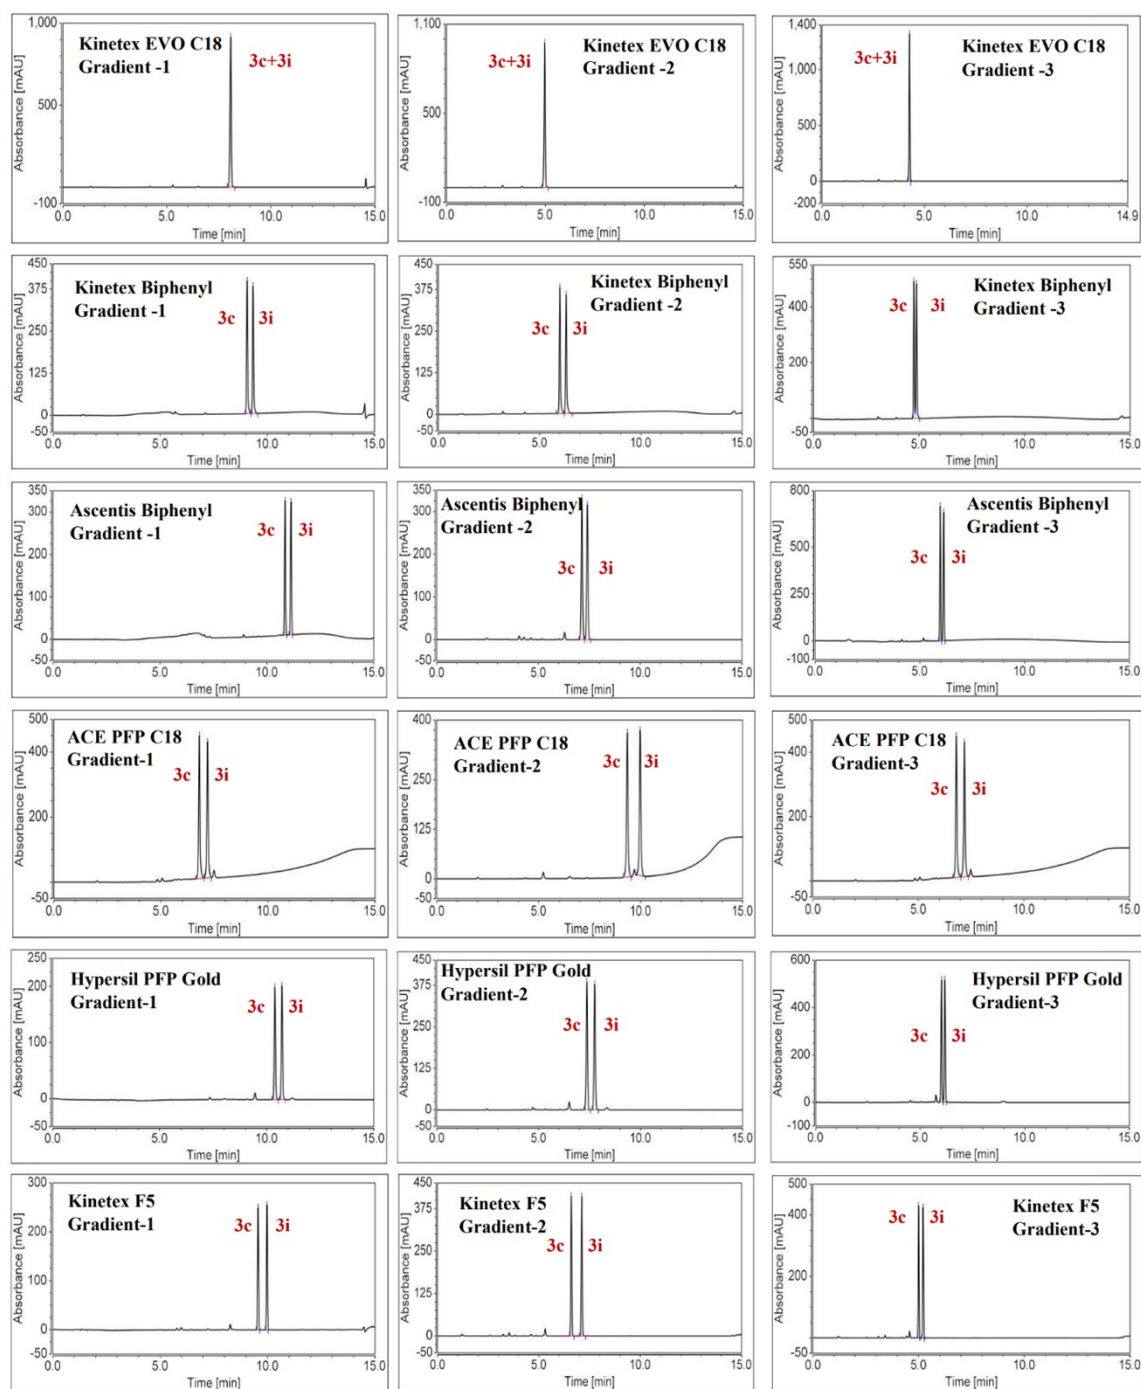

**Figure S3:** Chromatograms of separation of racemate 3c and 3i with mobile phase A as 10 mM ammonium acetate in water (pH 4.5) and mobile phase B as 100% ACN with different stationary phases.

The chromatogram in above figure shows that, racemates 3c and 3i were not separated using the C18 stationary phase and less separation was observed with Kinetex biphenyl as well as Ascentis biphenyl stationary phases. The racemates were found to be well separated with all PFP columns whereas Kinetex F5 column gives a maximum resolution of 5.5 with good peak shape.

**Table S2:** Chromatograms of separation of racemate 3c and 3i with mobile phase A as 10 mM ammonium acetate in water (pH 4.5) and mobile phase B as 100% ACN with different stationary phases.

| Column-ID                                        | Gradient     | Peak Name | Retention time (min) | Peak asymmetry | Resolution | Remarks                               |
|--------------------------------------------------|--------------|-----------|----------------------|----------------|------------|---------------------------------------|
| Kinetex EVO C18<br>(100x4.6mm), 2.6µm            | Gradient - 1 | 3c        | 8.61                 | 0.86           | No         | No separation between 3c and 3i       |
|                                                  |              | 3i        |                      |                |            |                                       |
|                                                  | Gradient – 2 | 3c        | 4.97                 | 0.90           | No         |                                       |
|                                                  |              | 3i        |                      |                |            |                                       |
|                                                  | Gradient - 3 | 3c        | 4.27                 | 0.93           | No         |                                       |
|                                                  |              | 3i        |                      |                |            |                                       |
| Kinetex BPH<br>(100x4.6mm), 2.6µm                | Gradient - 1 | 3c        | 9.07                 | 1.14           | 3.0        | Separation observed between 3c and 3i |
|                                                  |              | 3i        | 9.34                 | 1.18           |            |                                       |
|                                                  | Gradient – 2 | 3c        | 6.00                 | 1.20           | 3.3        |                                       |
|                                                  |              | 3i        | 6.32                 | 1.16           |            |                                       |
|                                                  | Gradient - 3 | 3c        | 4.76                 | 1.13           | 1.7        |                                       |
|                                                  |              | 3i        | 4.88                 | 1.00           |            |                                       |
| Ascentis® Express Biphenyl<br>(100x2.1mm), 2.7µm | Gradient - 1 | 3c        | 10.85                | 0.97           | 3.2        | Separation observed between 3c and 3i |
|                                                  |              | 3i        | 11.13                | 0.98           |            |                                       |
|                                                  | Gradient – 2 | 3c        | 8.09                 | 1.00           | 3.8        |                                       |
|                                                  |              | 3i        | 8.47                 | 0.96           |            |                                       |
|                                                  | Gradient - 3 | 3c        | 5.98                 | 1.03           | 2.1        |                                       |
|                                                  |              | 3i        | 6.14                 | 0.95           |            |                                       |
| ACE PFP C18<br>(150x4.6mm), 3µm                  | Gradient - 1 | 3c        | 11.82                | 1.00           | 3.7        | Better resolution of 3c and 3i        |
|                                                  |              | 3i        | 12.26                | 0.93           |            |                                       |
|                                                  | Gradient – 2 | 3c        | 9.34                 | 1.02           | 5.1        |                                       |
|                                                  |              | 3i        | 9.98                 | 1.01           |            |                                       |
|                                                  | Gradient - 3 | 3c        | 6.80                 | 1.09           | 3.5        |                                       |
|                                                  |              | 3i        | 7.18                 | 1.02           |            |                                       |
| Thermo Hypersil gold PFP<br>(150x4.6mm), 1.9µm)  | Gradient - 1 | 3c        | 10.38                | 0.93           | 3.0        | Separation observed between 3c and 3i |
|                                                  |              | 3i        | 10.71                | 1.03           |            |                                       |
|                                                  | Gradient – 2 | 3c        | 7.37                 | 0.97           | 3.2        |                                       |
|                                                  |              | 3i        | 7.75                 | 1.02           |            |                                       |
|                                                  | Gradient - 3 | 3c        | 6.03                 | 0.93           | 1.7        |                                       |
|                                                  |              | 3i        | 6.18                 | 1.05           |            |                                       |
| Kinetex F5<br>(150x4.6mm), 2.6 µm                | Gradient - 1 | 3c        | 9.56                 | 1.05           | 4.9        | Best Separation                       |
|                                                  |              | 3i        | 9.98                 | 1.01           |            |                                       |
|                                                  | Gradient – 2 | 3c        | 6.60                 | 0.99           | 5.5        |                                       |
|                                                  |              | 3i        | 7.12                 | 1.04           |            |                                       |
|                                                  | Gradient - 3 | 3c        | 5.00                 | 1.03           | 2.9        |                                       |
|                                                  |              | 3i        | 5.22                 | 0.94           |            |                                       |

**Table S3:** Chromatograms of separation of racemate 3c and 3i with mobile phase A as 10mM ammonium acetate in water (pH 7.0) and mobile phase B as ACN with different stationary phases.

| Column used in first dimension                | Gradient     | Peak Name | Retention time (min) | Peak asymmetry | Resolution | Remarks                                                        |
|-----------------------------------------------|--------------|-----------|----------------------|----------------|------------|----------------------------------------------------------------|
| Kinetex EVO C18 (100x4.6mm), 2.6µm            | Gradient - 1 | 3c        | 8.06                 | 1.16           | No         | No separation of 3c and 3i                                     |
|                                               |              | 3i        |                      |                |            |                                                                |
|                                               | Gradient – 2 | 3c        | 4.96                 | 1.47           | No         |                                                                |
|                                               |              | 3i        |                      |                |            |                                                                |
|                                               | Gradient - 3 | 3c        | 4.26                 | 1.75           | No         |                                                                |
|                                               |              | 3i        |                      |                |            |                                                                |
| Kinetex BPH (100x4.6mm), 2.6µm                | Gradient - 1 | 3c        | 9.07                 | 1.14           | 3.0        | Separation of 3c and 3i observed                               |
|                                               |              | 3i        | 9.34                 | 1.18           |            |                                                                |
|                                               | Gradient – 2 | 3c        | 6.00                 | 1.20           | 3.3        |                                                                |
|                                               |              | 3i        | 6.32                 | 1.16           |            |                                                                |
|                                               | Gradient - 3 | 3c        | 4.76                 | 1.13           | 1.7        |                                                                |
|                                               |              | 3i        | 4.88                 | 1.00           |            |                                                                |
| Ascentis® Express Biphenyl (100x2.1mm), 2.7µm | Gradient - 1 | 3c        | 10.85                | 0.97           | 3.2        | Baseline peak separation obtained                              |
|                                               |              | 3i        | 11.13                | 0.98           |            |                                                                |
|                                               | Gradient – 2 | 3c        | 8.09                 | 1.00           | 3.8        |                                                                |
|                                               |              | 3i        | 8.47                 | 0.96           |            |                                                                |
|                                               | Gradient - 3 | 3c        | 5.98                 | 1.03           | 2.1        |                                                                |
|                                               |              | 3i        | 6.14                 | 0.95           |            |                                                                |
| ACE PFP C18 (150x4.6mm), 3µm                  | Gradient - 1 | 3c        | 11.87                | 1.04           | 4.1        | Better resolution of 3c and 3i as compared with other columns  |
|                                               |              | 3i        | 12.30                | 1.12           |            |                                                                |
|                                               | Gradient – 2 | 3c        | 9.60                 | 0.95           | 5.1        |                                                                |
|                                               |              | 3i        | 10.24                | 1.01           |            |                                                                |
|                                               | Gradient - 3 | 3c        | 6.96                 | 0.98           | 3.7        |                                                                |
|                                               |              | 3i        | 7.38                 | 0.92           |            |                                                                |
| Thermo Hypersil gold PFP (150x4.6mm), 1.9µm)  | Gradient - 1 | 3c        | 10.4                 | 0.95           | 3.2        | Baseline peak separation obtained                              |
|                                               |              | 3i        | 10.74                | 0.94           |            |                                                                |
|                                               | Gradient – 2 | 3c        | 7.39                 | 0.93           | 3.3        |                                                                |
|                                               |              | 3i        | 7.78                 | 1.01           |            |                                                                |
|                                               | Gradient - 3 | 3c        | 6.02                 | 0.97           | 1.8        |                                                                |
|                                               |              | 3i        | 6.18                 | 1.06           |            |                                                                |
| Kinetex F5 (150x4.6mm), 2.6 µm                | Gradient - 1 | 3c        | 9.57                 | 0.94           | 4.9        | Highest resolution of 3c and 3i as compared with other columns |
|                                               |              | 3i        | 9.98                 | 0.97           |            |                                                                |
|                                               | Gradient – 2 | 3c        | 8.58                 | 1.01           | 6.6        |                                                                |
|                                               |              | 3i        | 9.20                 | 0.98           |            |                                                                |
|                                               | Gradient - 3 | 3c        | 5.00                 | 1.02           | 2.9        |                                                                |
|                                               |              | 3i        | 5.22                 | 0.93           |            |                                                                |

The coelution of the racemate 3c and 3i were observed using the C18 stationary phase. The racemates were separated with both biphenyl columns and Thermo Hypersil Gold PFP column but with low resolution. Better resolution was obtained with the ACE PFP C18 column whereas Kinetex F5 column gives a maximum resolution of 6.6 with good peak shape.

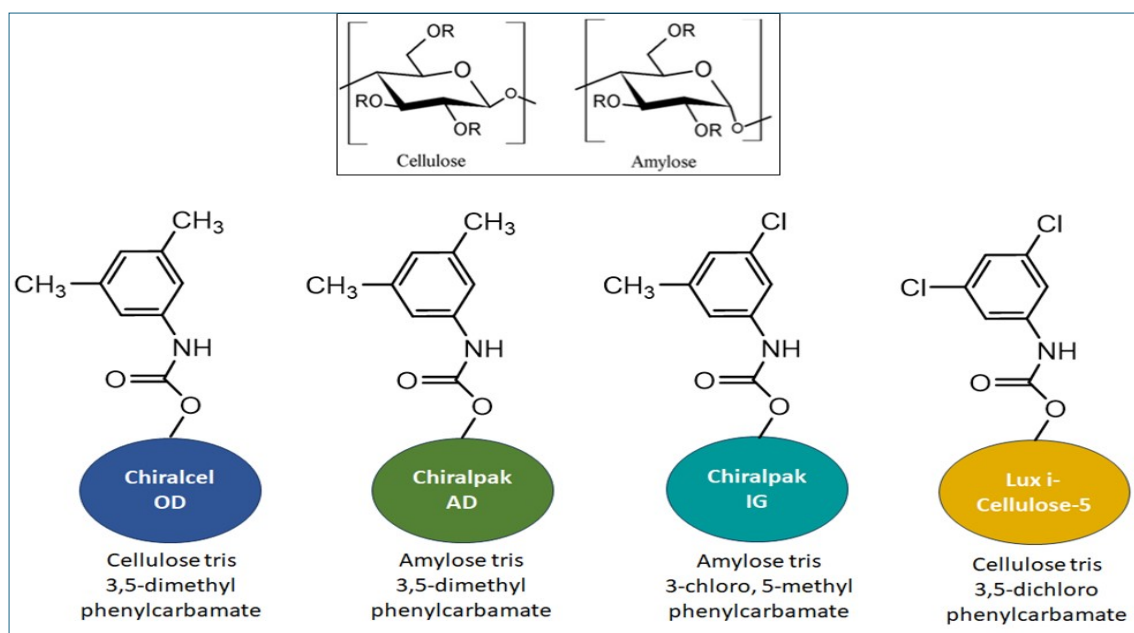

**Figure S4:** Structures of chiral stationary phases.



**Table S4.** Chromatograms of separation of 3c (R and S) and 3i (R and S) enantiomers using the Chiralcel-OD-H column with the mobile phase as different combination of 0.1% DEA in MeOH and ACN.

| Stationary Phase                   | Chiralcel-OD-H |                      |                |            |                                                                    |
|------------------------------------|----------------|----------------------|----------------|------------|--------------------------------------------------------------------|
| Chromatographic conditions         | Compound Name  | Retention time (min) | Peak asymmetry | Resolution | Remarks                                                            |
| 0.1% DEA in MeOH (100%)            | 3c-(R+S)       | 12.53                | 1.37           | NA         | Single peak was observed for 3c and separation was observed for 3i |
|                                    |                | NA                   | NA             |            |                                                                    |
|                                    | 3i- (R+S)      | 11.17                | 1.25           | 2.17       |                                                                    |
|                                    |                | 12.63                | 1.15           |            |                                                                    |
| 0.1% DEA in MeOH: ACN (90: 10 v/v) | 3c-(R+S)       | 8.23                 | 1.41           | 6.00       | Sharp peaks with maximum resolution                                |
|                                    |                | 11.30                | 1.08           |            |                                                                    |
|                                    | 3i- (R+S)      | 7.98                 | 1.25           | 2.84       |                                                                    |
|                                    |                | 9.05                 | 1.15           |            |                                                                    |
| 0.1% DEA in MeOH: ACN (70: 30 v/v) | 3c-(R+S)       | 6.20                 | 1.21           | 5.84       | Both peak separated but more resolution required                   |
|                                    |                | 7.44                 | 1.12           |            |                                                                    |
|                                    | 3i- (R+S)      | 5.87                 | 1.31           | 2.77       |                                                                    |
|                                    |                | 6.44                 | 1.22           |            |                                                                    |
| 0.1% DEA in MeOH: ACN (50: 50 v/v) | 3c-(R+S)       | 5.68                 | 1.23           | 4.31       | Sharp peaks with less separation                                   |
|                                    |                | 6.38                 | 1.20           |            |                                                                    |
|                                    | 3i- (R+S)      | 5.21                 | 1.29           | 2.38       |                                                                    |
|                                    |                | 5.60                 | 1.18           |            |                                                                    |
| 0.1% DEA in MeOH: ACN (30: 70 v/v) | 3c-(R+S)       | 5.43                 | 1.21           | 3.62       | Sharp peaks with less resolution comparatively                     |
|                                    |                | 6.03                 | 1.25           |            |                                                                    |
|                                    | 3i- (R+S)      | 5.07                 | 1.24           | 2.50       |                                                                    |
|                                    |                | 5.46                 | 1.17           |            |                                                                    |

With 0.1% DEA in methanol (100%) as a mobile phase, only one peak was observed for 3c, and two peaks were observed for 3i. All other combinations have provided the separation for the 3c and 3i enantiomers with best peak shapes and separation observed with the 0.1% DEA in methanol:ACN (90:10 v/v) ratio.

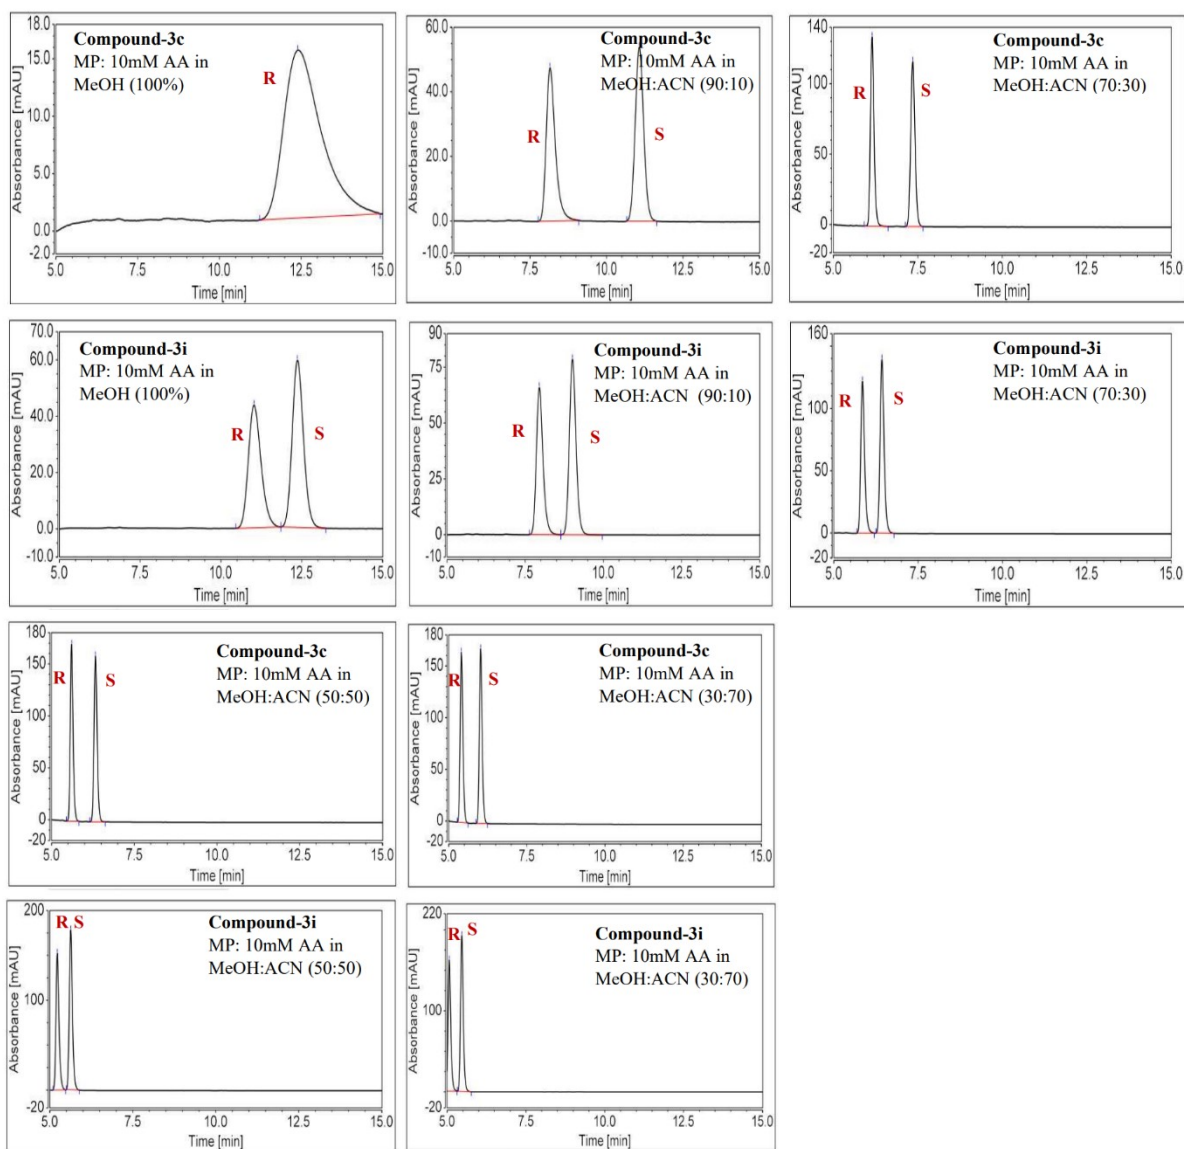

**Figure S5:** Chromatograms of separation of 3c (R and S) and 3i (R and S) enantiomers using the Chiralcel-OD-H column with the mobile phase as a different combination of 10 mM ammonium acetate in MeOH and ACN.

The above chromatograms showed that single peak was obtained for the 3c and two peaks for 3i (R and S) enantiomers. Best separation for 3c (R and S) and 3i (R and S) enantiomers with good peak shape were observed with 10% ACN. In other combinations of ammonium acetate and ACN, 3c and 3i enantiomers were eluted with good peak shape but with less resolution.

**Table S5:** Chromatograms of separation of 3c (R and S) and 3i (R and S) enantiomers using the Chiralcel-OD-H column with the mobile phase as a different combination of 10 mM ammonium acetate in MeOH and ACN.

| Stationary Phase                                 | Chiralcel-OD-H |                      |                |            |                                                                     |
|--------------------------------------------------|----------------|----------------------|----------------|------------|---------------------------------------------------------------------|
| Chromatographic conditions                       | Compound Name  | Retention time (min) | Peak asymmetry | Resolution | Remarks                                                             |
| 10 mM Ammonium Acetate in MeOH (100%)            | 3c-(R+S)       | 12.40                | 1.60           | NA         | Single peak was observed for 3c, and separation was observed for 3i |
|                                                  |                | NA                   | NA             |            |                                                                     |
|                                                  | 3i- (R+S)      | 11.03                | 1.22           | 1.99       |                                                                     |
|                                                  |                | 12.37                | 1.15           |            |                                                                     |
| 10 mM Ammonium Acetate in MeOH: ACN (90: 10 v/v) | 3c-(R+S)       | 8.15                 | 1.43           | 5.66       | We observed best separation                                         |
|                                                  |                | 11.08                | 1.07           |            |                                                                     |
|                                                  | 3i- (R+S)      | 7.95                 | 1.27           | 2.77       |                                                                     |
|                                                  |                | 9.01                 | 1.16           |            |                                                                     |
| 10 mM Ammonium Acetate in MeOH: ACN (70: 30 v/v) | 3c-(R+S)       | 6.15                 | 1.19           | 5.65       | We observed good separation                                         |
|                                                  |                | 7.35                 | 1.13           |            |                                                                     |
|                                                  | 3i- (R+S)      | 5.85                 | 1.26           | 2.77       |                                                                     |
|                                                  |                | 6.43                 | 1.19           |            |                                                                     |
| 10 mM Ammonium Acetate in MeOH: ACN (50: 50 v/v) | 3c-(R+S)       | 5.61                 | 1.15           | 4.44       | Both isomers separated                                              |
|                                                  |                | 6.33                 | 1.20           |            |                                                                     |
|                                                  | 3i- (R+S)      | 5.23                 | 1.30           | 2.47       |                                                                     |
|                                                  |                | 5.63                 | 1.18           |            |                                                                     |
| 10 mM Ammonium Acetate in MeOH: ACN (30: 70 v/v) | 3c-(R+S)       | 5.41                 | 1.17           | 3.85       | Both isomers separated but baseline needs to improve                |
|                                                  |                | 6.03                 | 1.16           |            |                                                                     |
|                                                  | 3i- (R+S)      | 5.07                 | 1.28           | 2.57       |                                                                     |
|                                                  |                | 5.47                 | 1.17           |            |                                                                     |

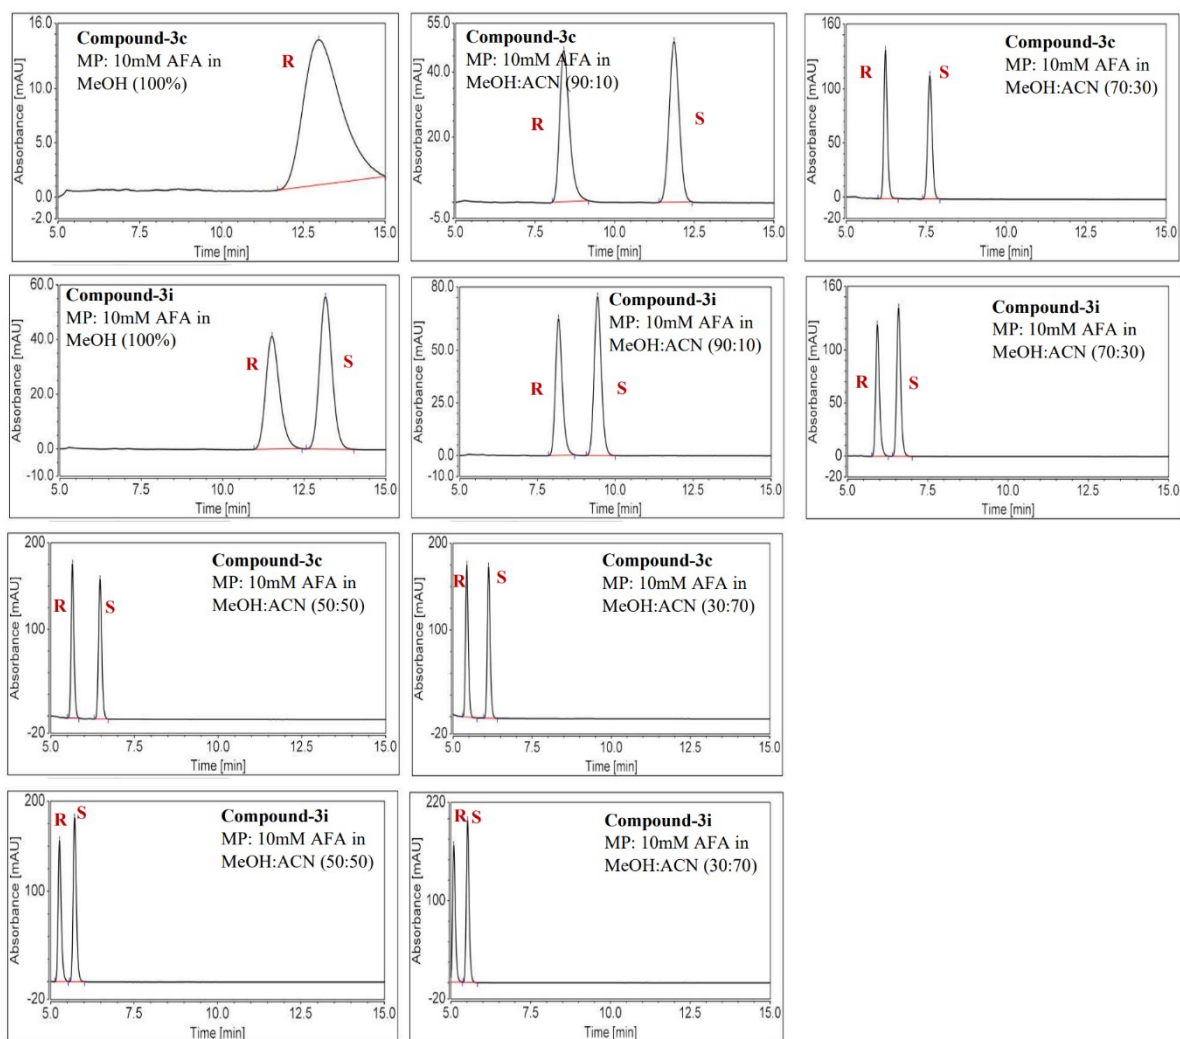

**Figure S6:** Chromatograms of the separation of 3c (R and S) and 3i (R and S) enantiomers using the Chiralcel-OD-H column with the mobile phase as a different combination of 10 mM ammonium formate in MeOH and ACN.

Similar findings were observed with the ammonium formate buffer as with the ammonium acetate buffer. Above chromatograms showed that single peak was obtained for the 3c and two peaks for 3i (R and S) enantiomers with 100% ammonium formate in methanol. Best separation for 3c (R and S) and 3i (R and S) enantiomers with good peak shape were observed with 10% ACN. In other combinations of ammonium formate and ACN, 3c and 3i enantiomers were eluted with good peak shape but with less resolution.

**Table S6:** Chromatograms of the separation of 3c (R and S) and 3i (R and S) enantiomers using the Chiralcel-OD-H column with the mobile phase as a different combination of 10 mM ammonium formate in MeOH and ACN.

| Stationary Phase                                | Chiralcel-OD-H |                      |                |            |                                                                     |
|-------------------------------------------------|----------------|----------------------|----------------|------------|---------------------------------------------------------------------|
| Chromatographic conditions                      | Compound Name  | Retention time (min) | Peak asymmetry | Resolution | Remarks                                                             |
| 10 mM Ammonium formate in MeOH (100%)           | 3c-(R+S)       | 12.98                | 1.41           | NA         | Single peak was observed for 3c, and separation was observed for 3i |
|                                                 |                | NA                   | NA             |            |                                                                     |
|                                                 | 3i- (R+S)      | 11.52                | 1.23           | 2.24       |                                                                     |
|                                                 |                | 13.16                | 1.12           |            |                                                                     |
| 10 mM Ammonium formate in MeOH: ACN (90:10 v/v) | 3c-(R+S)       | 8.40                 | 1.38           | 6.15       | Sharp peaks with maximum resolution                                 |
|                                                 |                | 11.87                | 1.06           |            |                                                                     |
|                                                 | 3i- (R+S)      | 8.18                 | 1.24           | 3.09       |                                                                     |
|                                                 |                | 9.43                 | 1.11           |            |                                                                     |
| 10 mM Ammonium formate in MeOH: ACN (70:30 v/v) | 3c-(R+S)       | 6.23                 | 1.22           | 6.21       | Both peak separated but more resolution required                    |
|                                                 |                | 7.62                 | 1.08           |            |                                                                     |
|                                                 | 3i- (R+S)      | 5.93                 | 1.32           | 3.09       |                                                                     |
|                                                 |                | 6.59                 | 1.15           |            |                                                                     |
| 10 mM Ammonium formate in MeOH: ACN (50:50 v/v) | 3c-(R+S)       | 5.65                 | 1.16           | 5.00       | Both the peaks merged with impurity                                 |
|                                                 |                | 6.48                 | 1.11           |            |                                                                     |
|                                                 | 3i- (R+S)      | 5.27                 | 1.28           | 2.67       |                                                                     |
|                                                 |                | 5.72                 | 1.24           |            |                                                                     |
| 10 mM Ammonium formate in MeOH: ACN (30:70 v/v) | 3c-(R+S)       | 5.43                 | 1.23           | 4.32       | Sharp peaks with less resolution comparatively                      |
|                                                 |                | 6.13                 | 1.17           |            |                                                                     |
|                                                 | 3i- (R+S)      | 5.09                 | 1.24           | 2.75       |                                                                     |
|                                                 |                | 5.53                 | 1.15           |            |                                                                     |

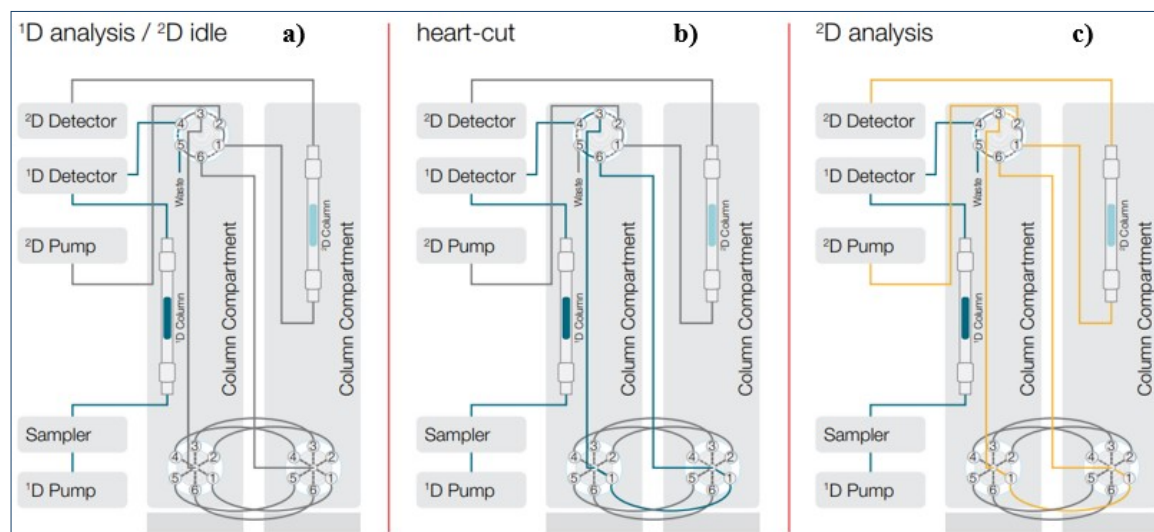

**Figure S7.** Flow schemes of the different steps in multi-heart-cut 2D-LC (example for loop 1)
